# Supplementary material for: Rapid Detection of Antimicrobial Resistance in Mycoplasma genitalium by High-Resolution Melting Analysis with Unlabeled Probes
Source: PubMed Central journal article supplement (PMC9430336; doi:10.1128/spectrum.01014-22), 2022-07-26
Supplement: spectrum.01014-22-s0001.pdf [file spectrum.01014-22-s0001.pdf]

## ***Supporting Information***

### **Legends of figures**

Figure 1. Workflow of the MG*parC*-AsyHRM method  
WT: Wild-type

Figure 2. Results of assays 1 and 2 of the MG*parC*-AsyHRM method

Figure 3. Flexibility of the MG*parC*-AsyHRM method. (a) Effect of a different probe; (b) performance of a probe harboring double mutations (S83I+D87Y); (c) compatibility of the probe with other genes; (d) generalizability of the MG*parC*-AsyHRM model; (e) adjustability of the MG*parC*-AsyHRM model.

### **Supplementary information**

Table S1 Primers and probes of real-time PCR used in this method.

Table S2 Primers of common PCR used in this study.

Table S3 Limit of detection of each target variant.

Figure S1 Illustration of sequence structure from 83 to 87 position in *parC* gene.

Table S1. Primers and probes of real-time PCR used in this method.

| Target gene | Direction | Primers                           | Reference |
|-------------|-----------|-----------------------------------|-----------|
| <i>MGpa</i> | Forward   | GAGAAATACCTTGATGGTCAGCAA          | (1)       |
|             | Reverse   | GTTAATATCATATAAAGCTCTACCGTTGTTATC |           |
|             | probe     | FAM-ACTTTGCAATCAGAAGGT-MGB        |           |

standard curve method:

We prepared plasmid containing *porA* and was diluted into a series of gradients (range from 1copy/  $\mu$  L to  $1 \times 10^4$ copy/  $\mu$  L) for making standard curve. The procedure of quantification is the same as described previously (2).

Table S2 Primers of common PCR used in this study

| Target gene | Direction           | Primers                       | Size (bp) | Reference  |
|-------------|---------------------|-------------------------------|-----------|------------|
| <i>parC</i> | in-Forward-119F1    | 5'GGTAAAACCAGTACAAAGACGGA3'   | 226       | this study |
|             | in-Reverse-385R1    | 5'ACACAGAAACCCGCTTAAGCT3'     |           |            |
|             | out- Forward -97F2  | 5'GCTTTACCTGATCTAAGAGATGGGT3' | 427       |            |
|             | out- Reverse--524R2 | 5'GCTATCCCCTCGCACCATT3'       |           |            |

Table S3, Limit of detection of each target variant.

| Target      | No. of replicates (%) for positive standards, copies/reaction |                   |       |       |       |       |       |       |       |       |       |       |       |       |       |       |
|-------------|---------------------------------------------------------------|-------------------|-------|-------|-------|-------|-------|-------|-------|-------|-------|-------|-------|-------|-------|-------|
|             | 1000                                                          |                   | 500   |       | 200   |       | 100   |       | 50    |       | 20    |       | 10    |       | 2     |       |
| Assay2      | probe*                                                        | parC <sup>#</sup> | probe | parC  | probe | parC  | probe | parC  | probe | parC  | probe | parC  | probe | parC  | probe | parC  |
| WT          | 10/10                                                         | 10/10             | 10/10 | 10/10 | 10/10 | 10/10 | 10/10 | 10/10 | 10/10 | 10/10 | 10/10 | 10/10 | 10/10 | 10/10 | 10/10 | 10/10 |
| S83C        | 10/10                                                         | 10/10             | 10/10 | 10/10 | 10/10 | 10/10 | 10/10 | 10/10 | 10/10 | 10/10 | 10/10 | 10/10 | 10/10 | 9/10  | 10/10 | 1/10  |
| S83N        | 10/10                                                         | 10/10             | 10/10 | 10/10 | 10/10 | 10/10 | 10/10 | 10/10 | 10/10 | 10/10 | 10/10 | 10/10 | 10/10 | 10/10 | 10/10 | 2/10  |
| S83R        | 10/10                                                         | 10/10             | 10/10 | 10/10 | 10/10 | 10/10 | 10/10 | 10/10 | 10/10 | 10/10 | 10/10 | 10/10 | 10/10 | 10/10 | 10/10 | 2/10  |
| S83I        | 10/10                                                         | 10/10             | 10/10 | 10/10 | 10/10 | 10/10 | 10/10 | 10/10 | 10/10 | 10/10 | 10/10 | 10/10 | 10/10 | 10/10 | 10/10 | 2/10  |
| D87H        | 10/10                                                         | 10/10             | 10/10 | 10/10 | 10/10 | 10/10 | 10/10 | 10/10 | 10/10 | 10/10 | 10/10 | 10/10 | 10/10 | 6/10  | 10/10 | 0/10  |
| D87Y        | 10/10                                                         | 10/10             | 10/10 | 10/10 | 10/10 | 10/10 | 10/10 | 10/10 | 10/10 | 10/10 | 10/10 | 10/10 | 10/10 | 10/10 | 10/10 | 5/10  |
| D87N        | 10/10                                                         | 10/10             | 10/10 | 10/10 | 10/10 | 10/10 | 10/10 | 10/10 | 10/10 | 10/10 | 10/10 | 10/10 | 10/10 | 10/10 | 10/10 | 1/10  |
| D87G        | 10/10                                                         | 10/10             | 10/10 | 10/10 | 10/10 | 10/10 | 10/10 | 10/10 | 10/10 | 10/10 | 10/10 | 10/10 | 10/10 | 3/10  | 10/10 | 0/10  |
| Assay1      |                                                               |                   |       |       |       |       |       |       |       |       |       |       |       |       |       |       |
| D87MT       | 10/10                                                         |                   | 10/10 |       | 10/10 |       | 10/10 |       | 10/10 |       | 10/10 |       | 10/10 |       | 10/10 | 9/10  |
| D87WT       | 10/10                                                         |                   | 10/10 |       | 10/10 |       | 10/10 |       | 10/10 |       | 10/10 |       | 10/10 |       | 10/10 | 7/10  |
| <i>mgpa</i> | 10/10                                                         |                   | 10/10 |       | 10/10 |       | 10/10 |       | 10/10 |       | 10/10 |       | 10/10 |       | 10/10 | 4/10  |
| <i>HBB</i>  | 10/10                                                         |                   | 10/10 |       | 10/10 |       | 10/10 |       | 10/10 |       | 10/10 |       | 10/10 |       | 10/10 | 9/10  |

\*probe, probe-amplicon; #parC, parC-amplicon

- 1、 Jensen JS, Björnelius E, Dohn B, Lidbrink P. Use of TaqMan 5' nuclease real-time PCR for quantitative detection of *Mycoplasma genitalium* DNA in males with and without urethritis who were attendees at a sexually transmitted disease clinic. *J Clin Microbiol.* 2004 Feb;42(2):683-92. doi: 10.1128/JCM.42.2.683-692.2004. PMID: 14766837; PMCID: PMC344445.
- 2、 Dupin N, Bijaoui G, Schwarzinger M et al. Detection and quantification of *Mycoplasma genitalium* in male patients with urethritis. *Clin Infect Dis.* 2003 Aug 15;37(4):602-5. doi: 10.1086/376990. Epub 2003 Jul 30.

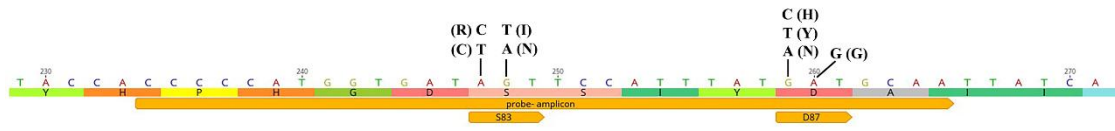

Figure S1. Illustration of sequence structure from 83 to 87 position in *parC* gene.
